# Supplementary material for: Mesenchymal stromal cells facilitate resolution of pulmonary fibrosis by miR-29c and miR-129 intercellular transfer
Source: PubMed Central journal article supplement (PMC10393964; doi:10.1038/s12276-023-01017-w), 2023-07-03
Supplement: 12276_2023_1017_MOESM1_ESM.pdf [file 12276_2023_1017_MOESM1_ESM.pdf]

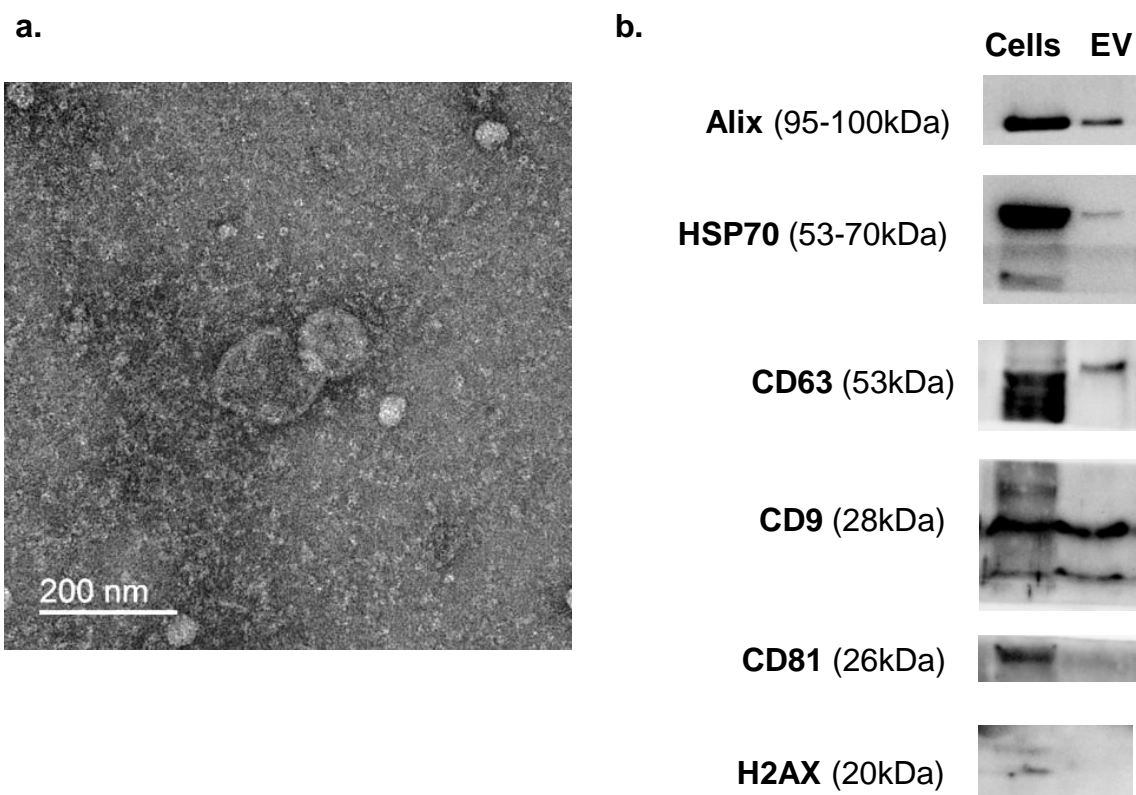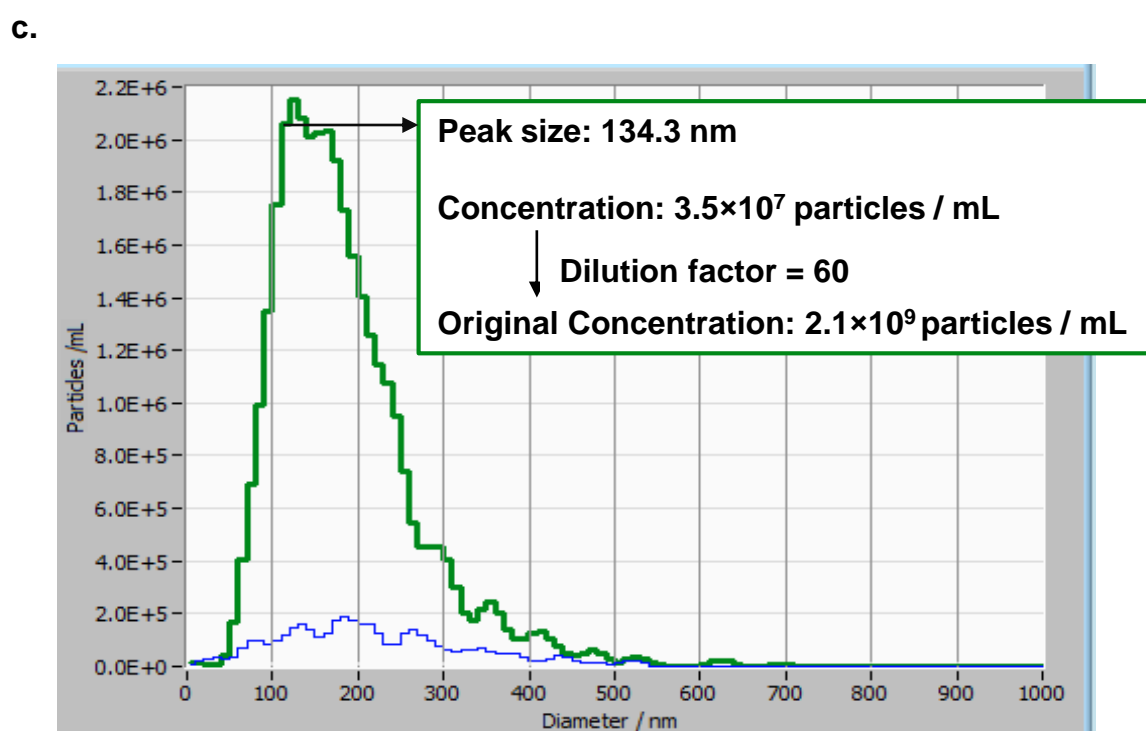

### Supplementary Fig. 1. MSC-EV characteristics.

**a.** Representative image of hMSC-EV visualized *via* transmission electron microscopy (TEM). Scale bar = 200 nm. **b.** Immunoblotting for Alix, HSP70, CD63, CD9, CD81, and H2AX in hMSC-EV and MSC lysates. **c.** Size and concentration analysis of non-concentrated hMSC-EV after 2 days of conditioning (green) and control aliquots of MSC-CM after 30 min of conditioning (blue) by NTA using ZetaView.

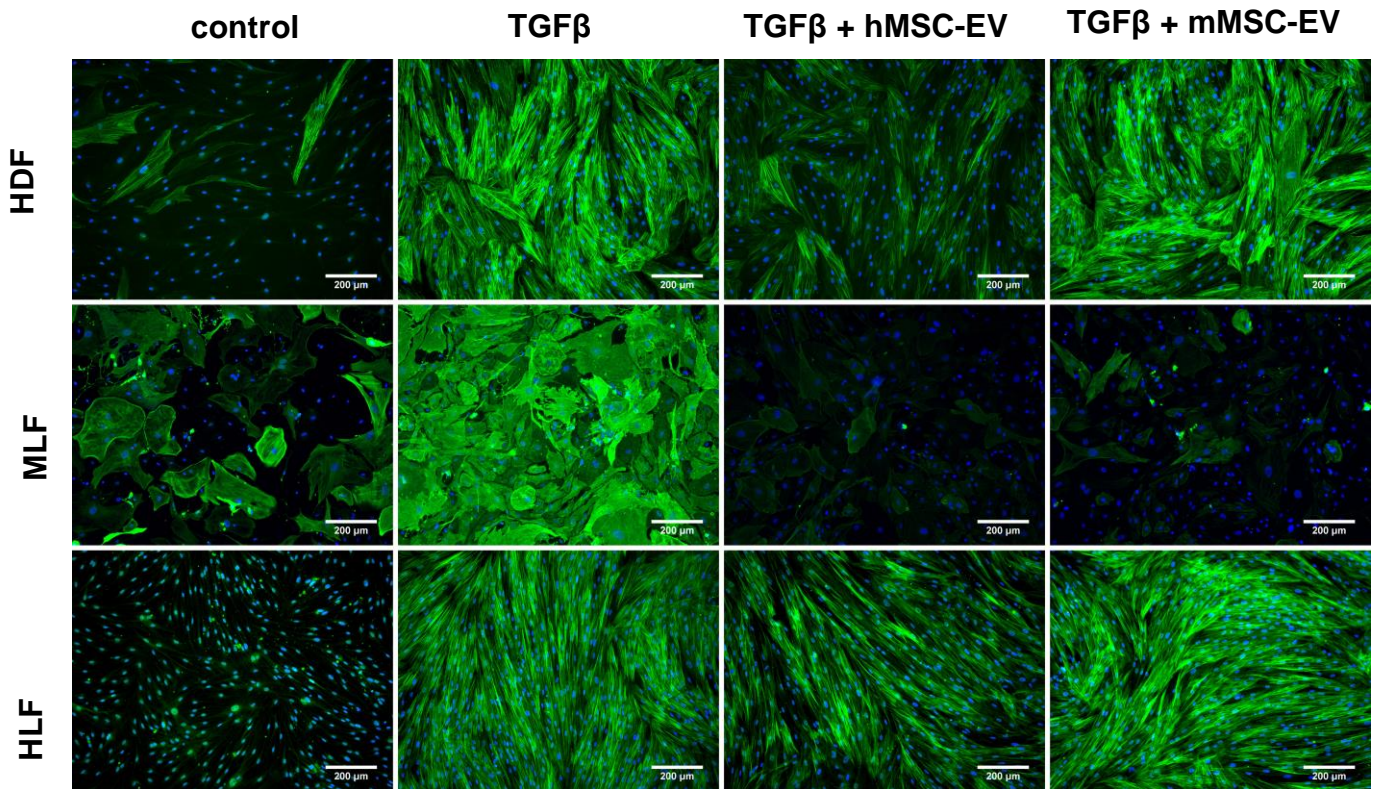

**Supplementary Fig. 2. Comparison of murine and human MSC-EV antifibrotic effects *in vitro*.** Representative images of HDF, MLF, and HLF immunocytochemical analysis for the  $\alpha$ SMA expression. The cells were incubated with TGF $\beta$  for 4 days (TGF $\beta$ ) in the presence of human MSC-EV (TGF $\beta$  + hMSC-EV) or murine MSC-EV (TGF $\beta$  + mMSC-EV) and compared with the cells cultured without TGF $\beta$  (control). Scale bar = 200  $\mu$ m.

a. MRI day 21 after bleomycin instillation

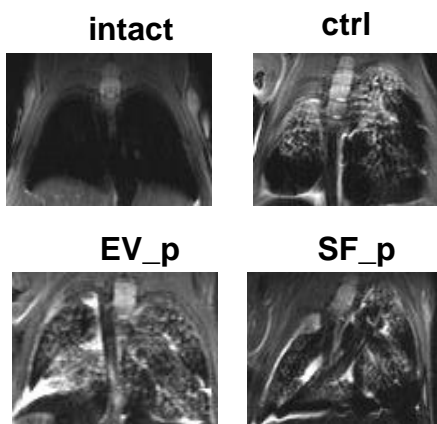

c. MRI day 28 after bleomycin instillation

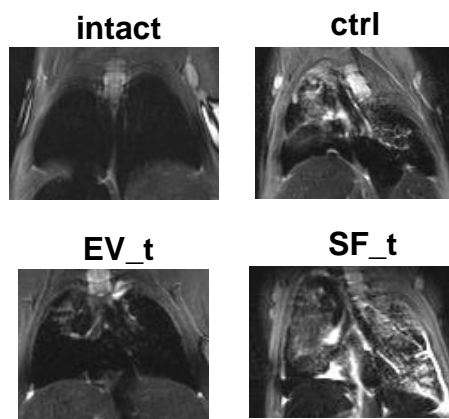

b. MRI dynamic, 7 - 21 day

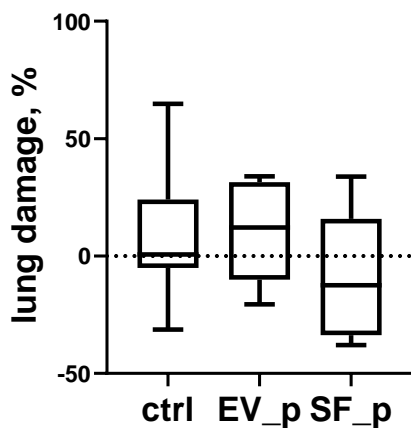

d. MRI dynamic, 7 - 27 day

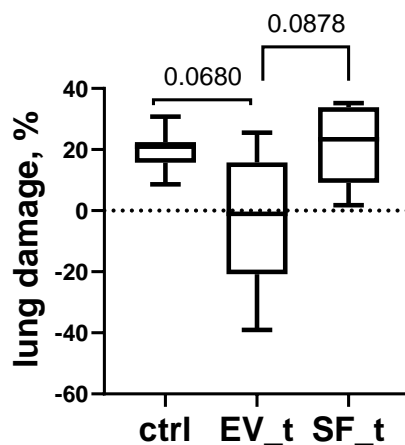

**Supplementary Fig. 3. Dynamic changes in the lung tissue density in mice with bleomycin-induced pulmonary fibrosis treated with MSC-EV measured via MRI.** **a.** Representative MR images for the fibrosis prevention groups. **b.** Quantification of dynamic changes in the lung tissue density measured *via* MRI in the fibrosis prevention groups. **a–b Ctrl** (DMEM 1 day after bleomycin administration),  $n = 11$ ; **EV\_p** (MSC extracellular vesicles 1 day after bleomycin administration),  $n = 9$ ; **SF\_p** (MSC soluble factors 1 day after bleomycin administration),  $n = 6$ ,  $n =$  biological independent animals per group. Number of analyzed fields of view per sample = 3–10 for each animal. **c.** Representative MR image for the fibrosis treatment groups. **d.** Quantification of dynamic changes in the lung tissue density measured *via* MRI in the fibrosis treatment groups. **c–d; Ctrl** (DMEM 14 days after bleomycin administration),  $n = 11$ ; **EV\_t** (MSC extracellular vesicles 14 days after bleomycin administration),  $n = 9$ ; **SF\_t** (MSC soluble factors 14 days after bleomycin administration),  $n = 6$ ;  $n =$  biological independent animals per group. Number of analyzed fields of view per sample = 3–10 for each animal.

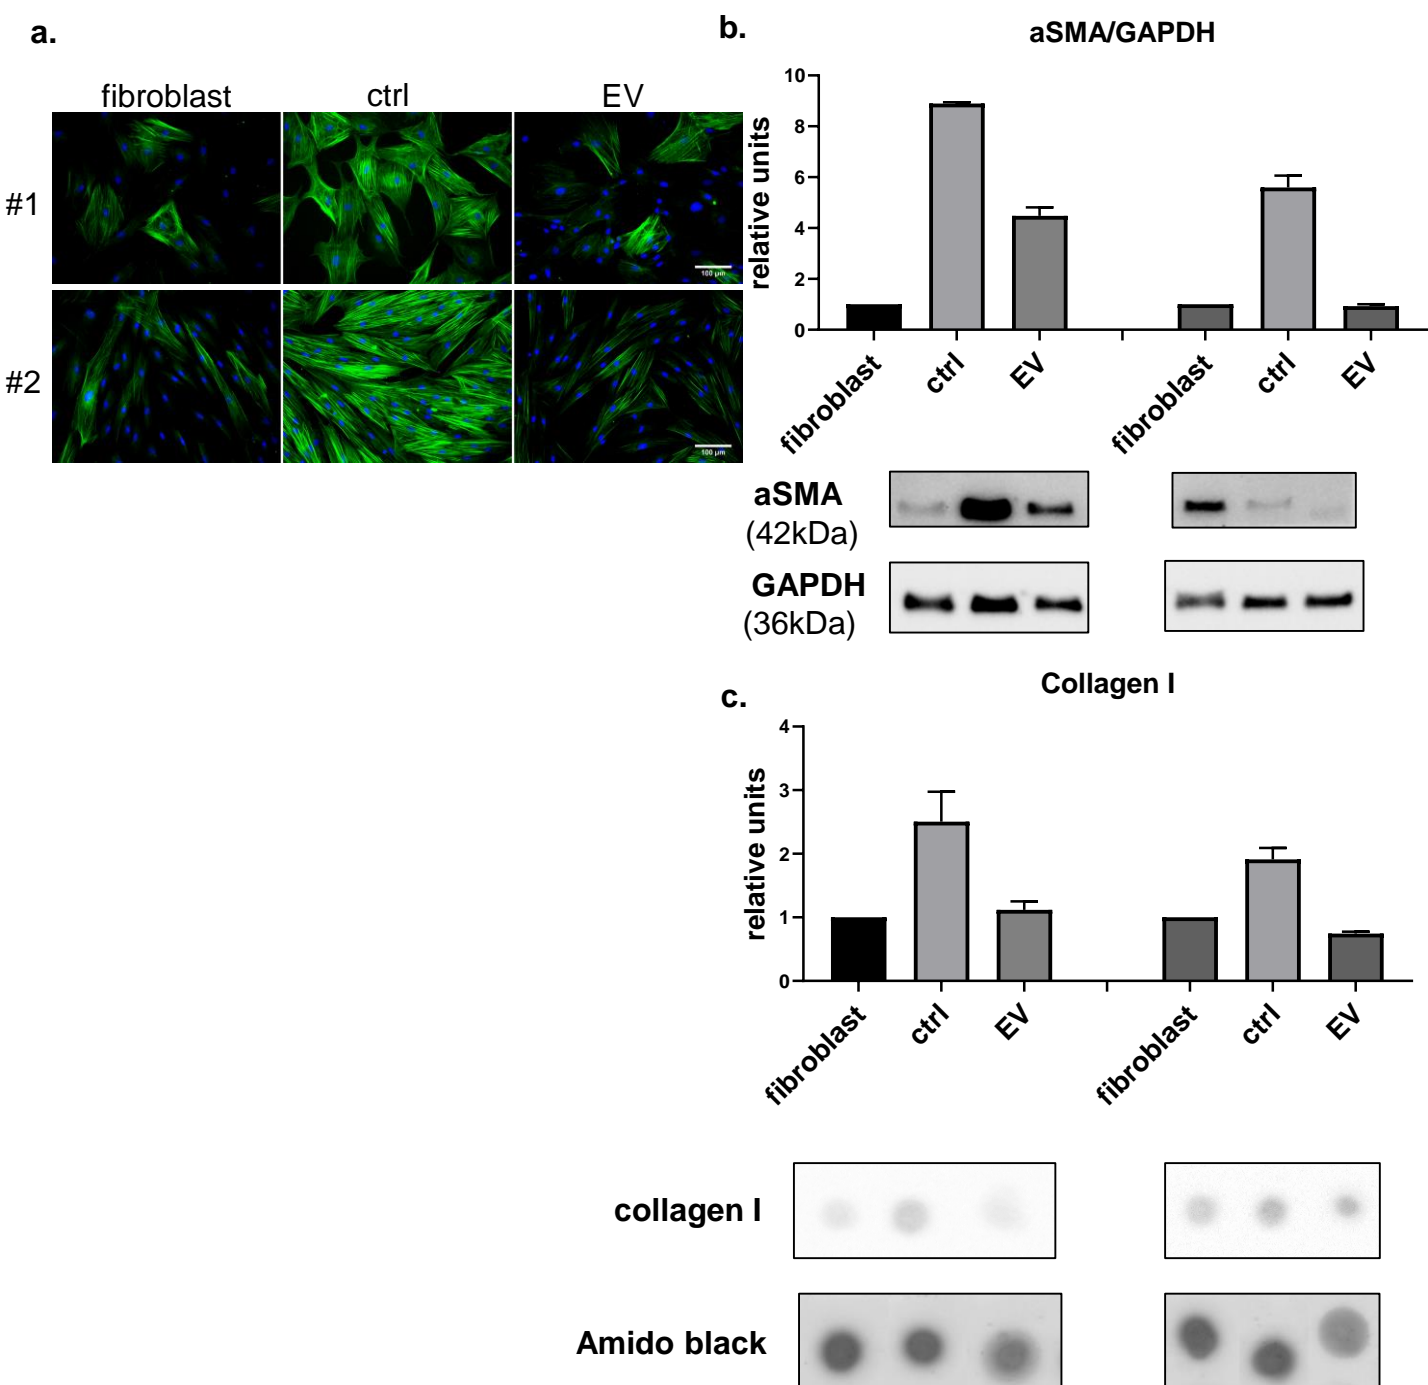

**Supplementary Fig. 4. Isolation of MSC-EV by gradient ultracentrifugation does not change their antifibrotic effect.**

**a.** Representative image of myofibroblast immunocytochemical analysis for the  $\alpha$ SMA expression. Scale bar = 100  $\mu$ m. **b.** Western-blot analysis of aSMA.  $n = 2$  biological independent experiments. **c.** Dot blot analysis of collagen type I.  $n = 2$  biological independent experiments for all methods. #1 and #2 – independent data for two different HDF donors. **Fibroblast** – undifferentiated fibroblasts, **ctrl** – myofibroblasts treated with DMEM during 4 days, **EV** – myofibroblasts treated with EV during 4 days.

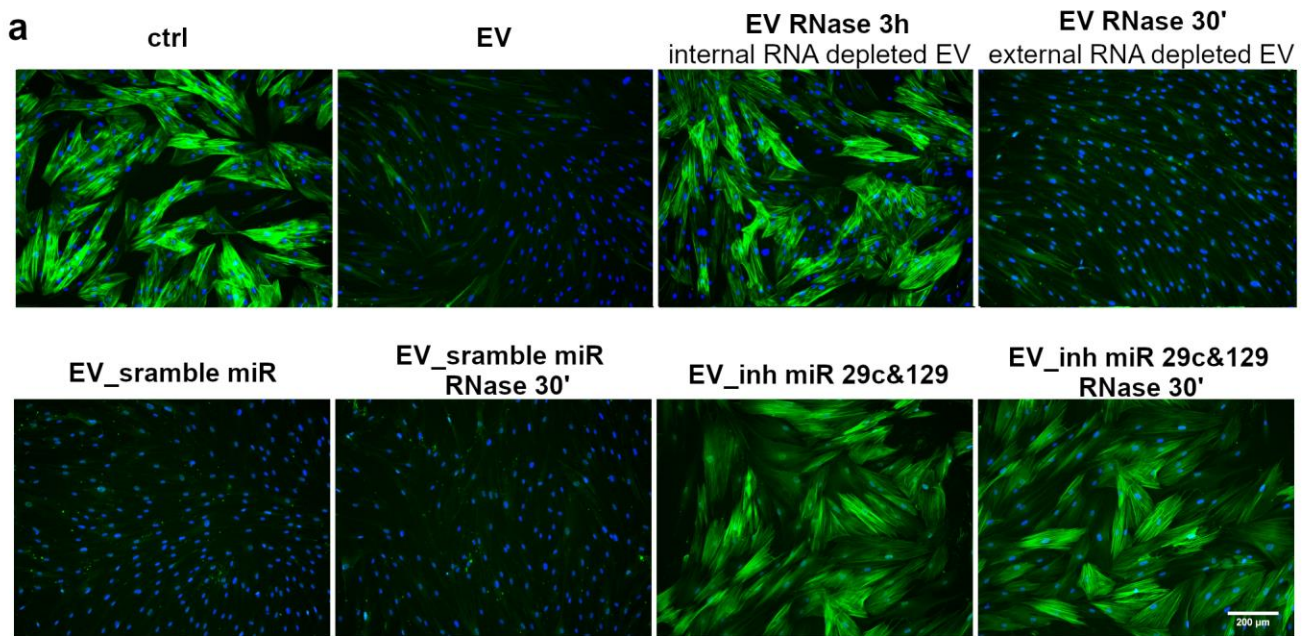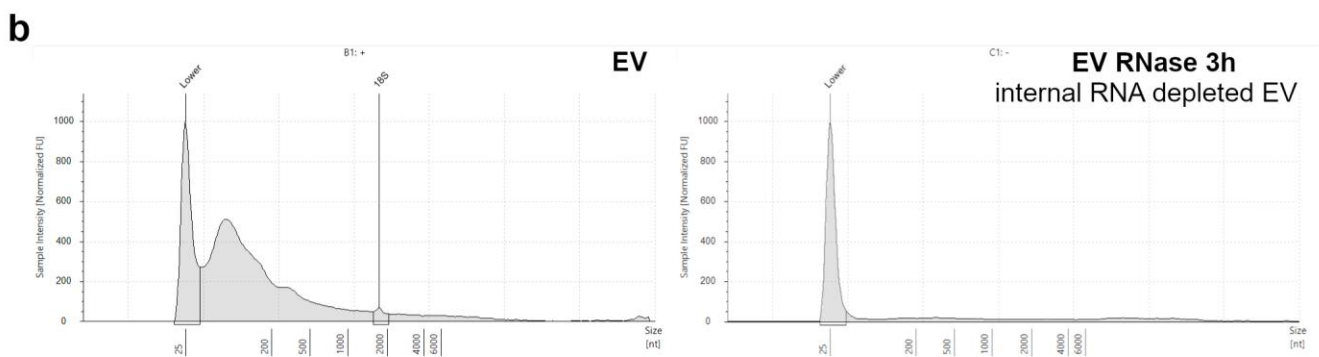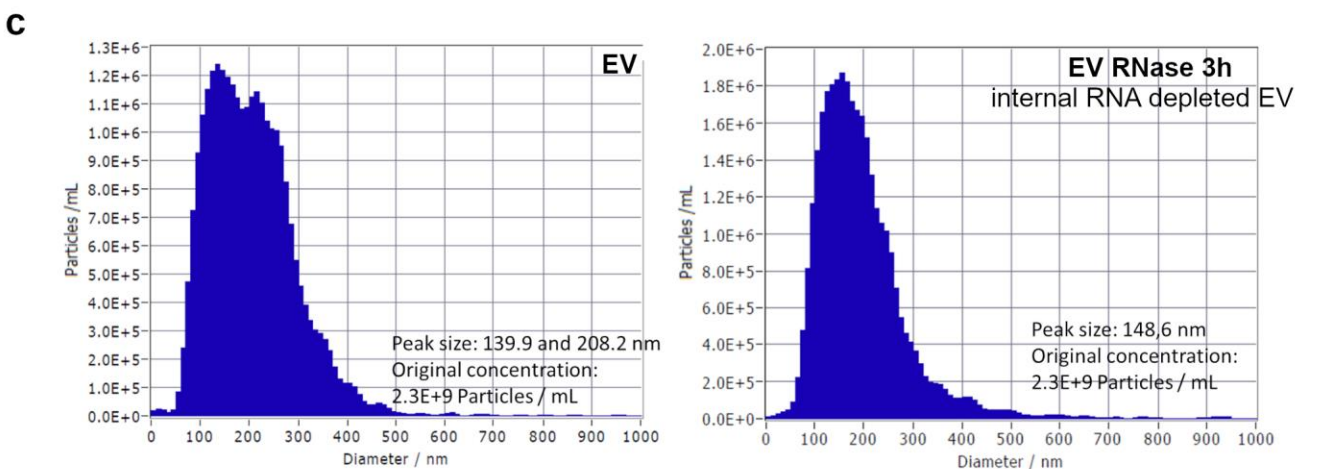

**Supplementary Fig. 5. Critical contribution of RNAs to the MSC-EV antifibrotic effects, part 1.** a. Representative image of the myofibroblast immunocytochemical analysis for the  $\alpha$ SMA expression in the presence of MSC-EV treated with RNase. MSC-EV treated with RNase for 3 h (EV RNase 3h, internal RNA-depleted EV) or for 30 min (EV RNase 30', external RNA-depleted EV), MSC-EV transfected by scramble miR  $\pm$  RNase 30-min treatment, MSC-EV transfected by the miR-29c and miR129 inhibitor  $\pm$  RNase 30-min treatment.  $n = 3$  biological independent experiments. b. Analysis of the length distribution of nucleic acid fragments within native MSC-EV or MSC-EV treated by RNase for 3 h. c NTA for MSC-EV or MSC-EV treated by RNase for 3 h.

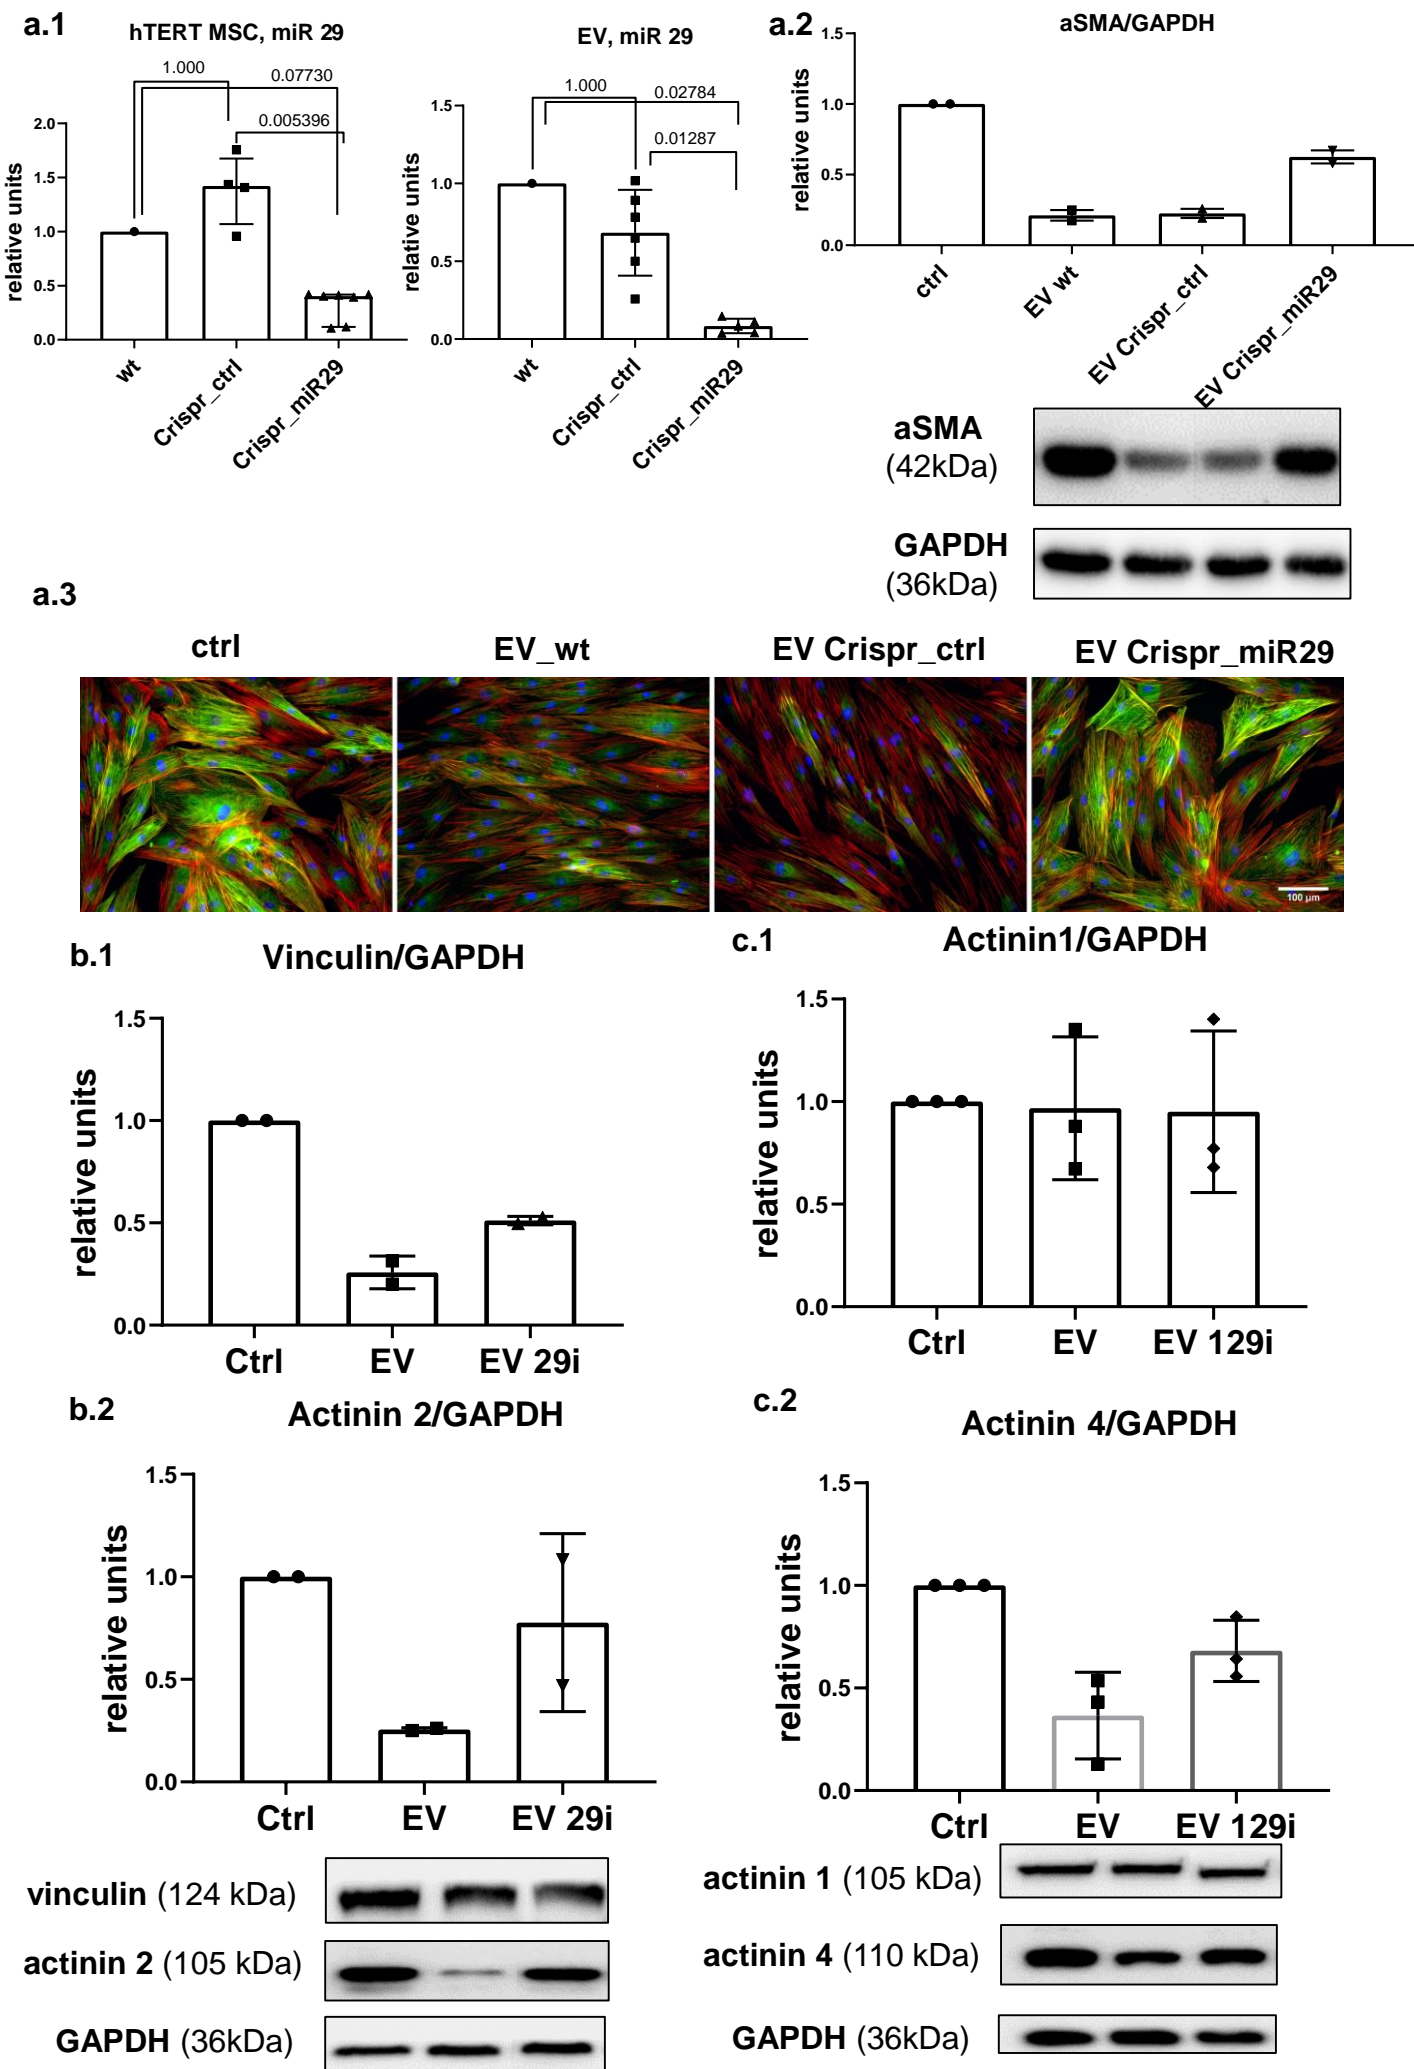

**Supplementary Fig. 6. Critical contribution of RNAs to the MSC-EV antifibrotic effects, part 2.** a. Representative image of the myofibroblast immunocytochemical analysis for the  $\alpha$ SMA expression in the presence of EV from MSC with Crispr-Cas9 miR-29 knockdown. Wt, EV from hTERT-MSC ; Crispr\_ctrl, EV from hTERT-MSC with Crispr-Cas9 nonsense knockdown; and Crispr\_miR29, EV from hTERT-MSC with Crispr-Cas9 miR-29 knockdown. b.1 miR29 expression within hTERT-MSC (left graph) or appropriate EV (right graph), RT-PCR. b.2,3. Analysis of the aSMA expression within the myfibroblasts after exposure to serum-free cultured control (ctrl) or hTERT-MSC EV (EV wt), hTERT-MSC Crispr\_ctrl EV (EV Crispr\_ctrl), or hTERT-MSC Crispr\_miR29 EV (EV Crispr\_miR29). b.2 Western blotting, b.3 immunocytochemical analysis, n = 2. b,c Western blot analysis specific targets for miR-29c (b1, b2. n = 2 biological independent experiments) and miR-129 (c1, c2. n = 3 biological independent experiments)

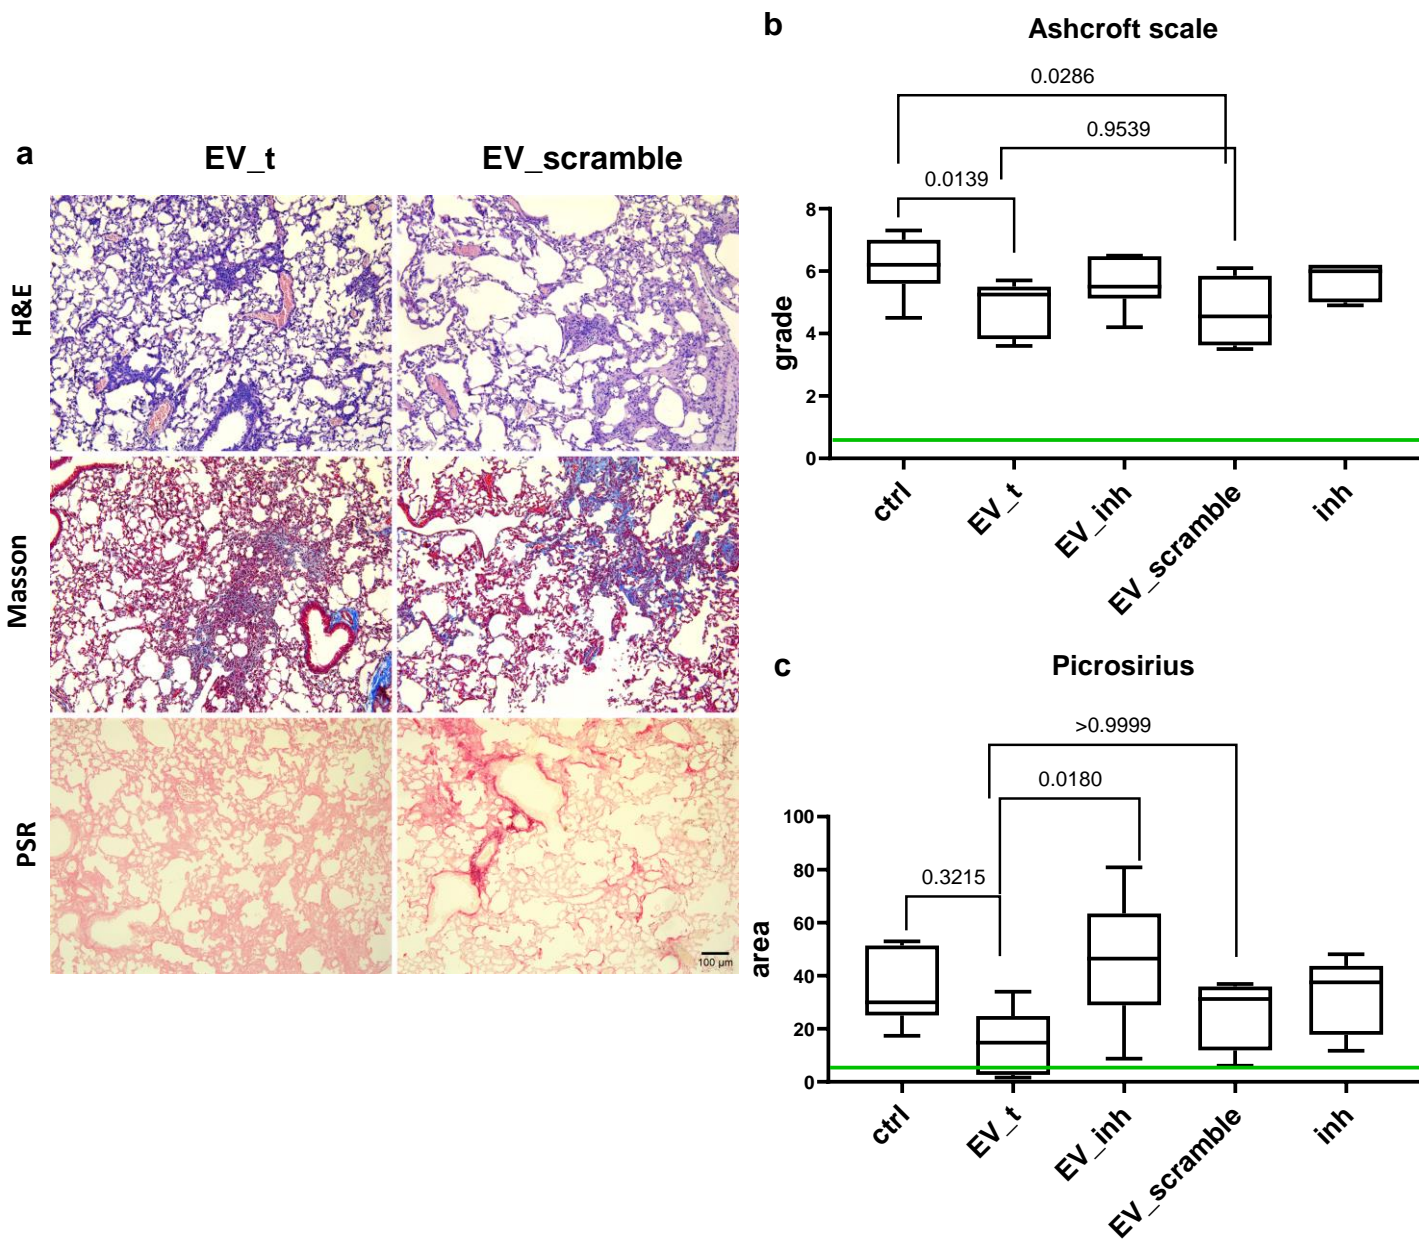

**Supplementary Fig. 7. MSC-EV transfection with scramble oligos as controls for specific miR inhibitors does not affect MSC-EV antifibrotic effects *in vivo*.** **a.** Representative images of hematoxylin–eosin (H&E), Masson trichrome and Picrosirius Red (PSR) staining. Scale bar = 100  $\mu$ m. **b.** Quantification of the pulmonary fibrosis severity using the Ashcroft scale; **Ctrl** (DMEM 14 days after bleomycin administration), n = 11; **EV\_t** (MSC extracellular vesicles 14 days after bleomycin administration), n = 9; **EV\_inh** (MSC extracellular vesicle, transfected by the miRNA-29 & miRNA-129 inhibitors 14s day after bleomycin administration), n = 8; **inh** (miRNA-29 and miRNA-129 inhibitors 14 days after bleomycin administration), n = 5; **EV\_scramble** (MSC extracellular vesicle, transfected by the miRNA Inhibitor Control 14s day after bleomycin administration), n = 4, n = biological independent animals per group. Assessment was conducted by two independent blinded experts. **c.** Quantification of the ECM deposition on the PSR staining image. The green line indicates the median for the intact group.

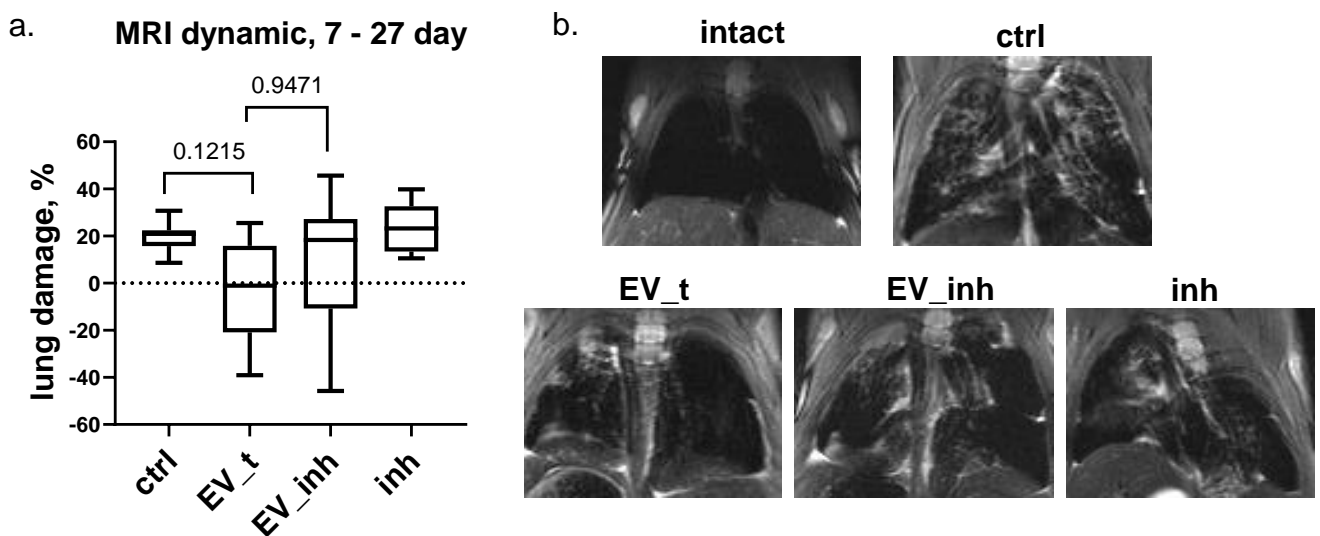

**Supplementary Fig. 8. Dynamic changes in the lung tissue density in mice with bleomycin-induced pulmonary fibrosis treated with MSC-EV transfected by miR inhibitors measured *via* MRI.** a. Quantification of dynamic changes in the lung tissue density measured *via* MRI. b. Representative MR images. **Ctrl** (DMEM 14 days after bleomycin administration), n = 11; **EV\_t** (MSC extracellular vesicles 14 days after bleomycin administration), n = 9; **EV\_inh** (MSC extracellular vesicle, transfected by the miRNA-29 & miRNA-129 inhibitors 14s day after bleomycin administration), n = 9; **inh** (miRNA-29 and miRNA-129 inhibitors 14 days after bleomycin administration), n = 5; n = biological independent animals per group. Number of analyzed fields of view per sample = 3–10 for each animal.



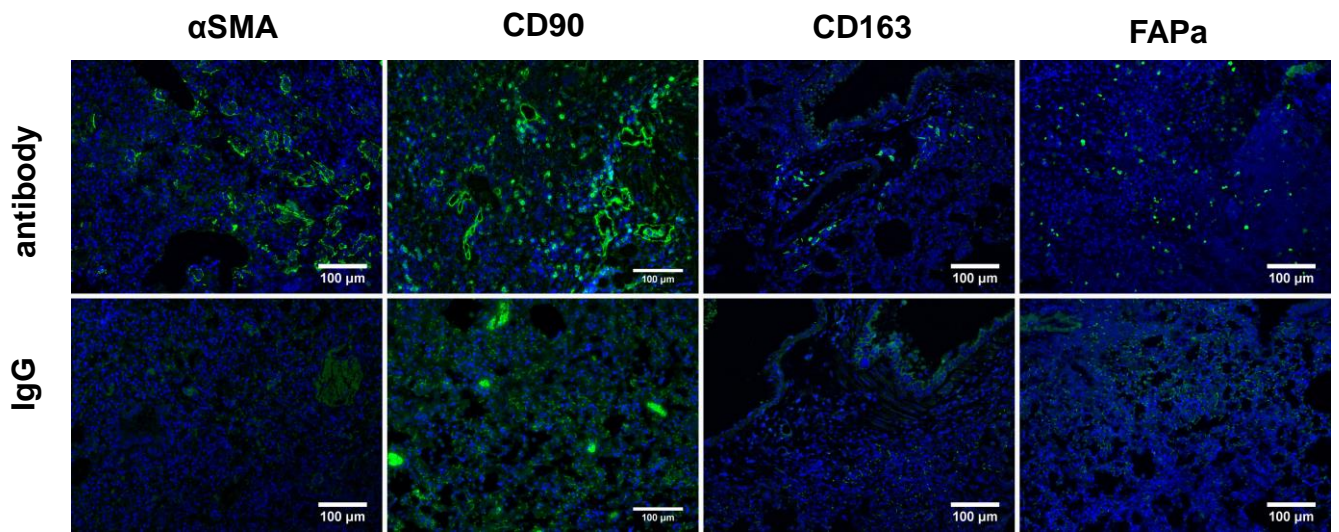

**Supplementary Fig. 9.** Immunohistochemical analysis for the  $\alpha$ SMA, CD90, CD163, and FAPa expressions in pulmonary tissue (antibody) compared with staining with the corresponding isotype control antibodies (IgG). Scale bar = 100  $\mu$ m.

## MicroRNA and Target Gene Description:

|                         |                                |                          |                           |
|-------------------------|--------------------------------|--------------------------|---------------------------|
| <b>miRNA Name</b>       | <a href="#">hsa-miR-129-5p</a> | <b>miRNA Sequence</b>    | CUUUUUGCGGUCUGGGCUUGC     |
| <b>Previous Name</b>    | hsa-miR-129                    |                          |                           |
| <b>Target Score</b>     | 90                             | <b>Seed Location</b>     | 96, 225                   |
| <b>NCBI Gene ID</b>     | <a href="#">1277</a>           | <b>GenBank Accession</b> | <a href="#">NM_000088</a> |
| <b>Gene Symbol</b>      | COL1A1                         | <b>3' UTR Length</b>     | 1406                      |
| <b>Gene Description</b> | collagen type I alpha 1 chain  |                          |                           |

### 3' UTR Sequence

```
1 actccctcca tcccaactg gtcctctccc acccaaccaa ctttcccccc aaccgggaaa
61 cagacaagca acccaactg aaccctctca aaagccaaaa aatgggagac aatttcacat
121 ggactttgga aatatTTTTT ttcctttgca ttcctctctc aaacttagtt tttatctttg
181 accaaccgaa catgacaaa aacaaaaagt gcattcaacc ttaccaaaaa aaaaaaaaaa
241 aaaagaataa ataaataact ttttaaaaaa ggaagcttgg tccacttgct tgaagaccca
301 tgcgggggta agtccctttc tgcccgttgg gcttatgaaa ccccaatgct gccctttctg
361 ctcttttctc cacaccccc ttggggcctc ccctccactc cttcccacaa ctgtctcccc
421 agaagacaca ggaacaatg tattgtctgc ccagcaatca aaggcaatgc tcaaacaccc
481 aagtggcccc cacctcagc ccgctctctc ccgcccagca cccccaggcc ctgggggacc
541 tggggttctc agactgccaa agaagccttg ccacttggcg ctcccatggc tcttgcaaca
601 tctccccctc gtttttgagg gggatcatgc gggggagcca ccagccccctc actgggttctg
661 gaggagatc aggaagggcc acgacaaaagc agaaacatcg gatttgggga acgctgtca
721 atcccttggt ccgacgggct gggcgggaga gactgttctg ttccttgggt aactgtgttg
781 ctgaagact acctcgttct tgtcttgatg tgtcaccggg gcaactgcct gggggcgggg
841 atgggggagc ggtggaagcg gctccccatt ttatacaaaa ggtgctacat ctatgtgatg
901 ggtggggtag ggagggaatc actggtgcta tagaaattga gatgcccccc caggccagca
961 aatgttcctt tttgttcaaa gtctatTTTT attccttgat attttctttt tttttttttt
1021 ttttttggg atggggactt gtgaattttt ctaaagggtc tatttaacat gggaggagag
1081 cgtgtgcggc tccagccagc cccgctgctc actttccacc ctctctccac ctgcctctgg
1141 cttctcaggc ctctgctctc cgacctctct cctctgaaac cctctccac agctgcagcc
1201 catctctccc gtcctctctc agtctgtcct gcctctctg tccccgggtt tcagagacaa
1261 cttcccaag cacaaagcag tttttcccc taggggtggg aggaagcaaa agactctgta
1321 cctattttgt atgtgataa taatttgaga tgtttttaa tattttgatt gctggaataa
1381 agcatgtgga aatgacccaa acataa
```

|                         |                                |                          |                           |
|-------------------------|--------------------------------|--------------------------|---------------------------|
| <b>miRNA Name</b>       | <a href="#">mmu-miR-129-5p</a> | <b>miRNA Sequence</b>    | CUUUUUGCGGUCUGGGCUUGC     |
| <b>Previous Name</b>    | mmu-miR-129                    |                          |                           |
| <b>Target Score</b>     | 60                             | <b>Seed Location</b>     | 228, 1421                 |
| <b>NCBI Gene ID</b>     | <a href="#">12842</a>          | <b>GenBank Accession</b> | <a href="#">NM_007742</a> |
| <b>Gene Symbol</b>      | Col1a1                         | <b>3' UTR Length</b>     | 1439                      |
| <b>Gene Description</b> | collagen, type I, alpha 1      |                          |                           |

### 3' UTR Sequence

```
1 actccctcca ccccaactg gttcctctccc acccagccca cttttcccca accctggaaa
61 cagacgaaca acccaaaactc aatttcccc aaaagccaaa aatatgggag ataatttcac
121 atggactttg gaaaacattt tttttctttt gcattcactc tcaaacctta gtttttacct
181 ttgaccaact gaacgtgacc aaaaaccaaa agtgattca accttaccaa aaaagaaaaa
241 aaaaaaaga ataaataaat aactttttaa aaaaggaagc ttggctctct tgcttgaaga
301 cctatgtggg tataagtccc ttcctgcccc ctggcttat gataccctaa tgctgccttt
361 tctgtctctt tctccacccc ctcttggggc ctctctcca ttgctccca aatttaagtc
421 tcccccaaga cacaggaaat aatgcattgt ctgcccagca acaaaaggca atgctgaaat
481 gtcccaccag cccctcaacc ccgtctactt ccctaccag caccctcaa tctgtctggg
541 acatgggggt ctggactgtg tgaaggaacc taacctctg gcactctcat ggcctctgca
601 acaaaccccc cacttttttc tctccccccc cccccaggga gggcctgtgc tttggcagc
661 cacctgcccc tctcaggggt ttggagccag gcagggctac agcagactgg aaacatcgga
721 catgcatgtg caggctgggt gggagagacc gttctatccc tcagtccaat tgtgtgctg
781 aaagactacc tcttcttctt ctttgtgtgt caccggggca actgtgtggg ggcggggatg
841 ggggcagggt ggcagcacgc ccagtttggg atcaaaaggc ctacatctct gtgaagggggt
901 ggggtgggaa ggaatttctg gtgctataga agctgagatg ctccctagac cagcaaatgt
961 tctttttgtt caaagtattt tttattcttt tttttttttt ttttaatgga tagggacttg
1021 tgtgaattgt tggggttttt tttttttttt tttttggttt tgtttttttt tgtttttttt
1081 tgtttttttt cctgaagggt ctatttaaca agggagaaga gagtgcgggg acttcacctc
1141 gccactctc tactctctct ccactcttct agttcctggg cctatctgat ctctctcttt
1201 cttctgaaac cctccccctc tgcctgctct cctccccctc tgccctctc ttgtctgtc
1261 ctgcatcagg gtttcagagc accacttcc aaagcacaaa acagtttta cccctgggct
1321 gggaggaaac aagagactct gtacctatgt tgtatgtgta taataattg agatgttttt
1381 aattattttg atgtctgtaa taaagcatgt ggaaatgacc caaaaaaaa aaaaaaaaaa
```

**Supplementary Table 1.** hsa-microRNA-129-5p and mmu-microRNA-129-5p have binding sites on collagen type I alpha 1

### MicroRNA and Target Gene Description:

|                  |                                |                   |                           |
|------------------|--------------------------------|-------------------|---------------------------|
| miRNA Name       | <a href="#">hsa-miR-29c-3p</a> | miRNA Sequence    | UAGCACCAUUUGAAAUCGGUUA    |
| Previous Name    | hsa-miR-29c                    |                   |                           |
| Target Score     | 98                             | Seed Location     | 881, 923, 1056            |
| NCBI Gene ID     | <a href="#">1277</a>           | GenBank Accession | <a href="#">NM_000088</a> |
| Gene Symbol      | COL1A1                         | 3' UTR Length     | 1406                      |
| Gene Description | collagen type I alpha 1 chain  |                   |                           |

### 3' UTR Sequence

```
1 actccctcca tcccaactcg gctccctccc acccaaccaa ctttccccc aaccggaaa
61 cagacaagca acccaactcg aaccctctca aaagcctaaa aatgggagac aatttcacat
121 ggactttgga aaatattttt ttcctttgca ttcattcttc aaacttagtt tttatctttg
181 accaaccgaa catgacccaa aaccacaaagt gcattcaacc ttaccaaaaa aaaaaaaaaa
241 aaaagaataa ataaataact ttttaaaaaa ggaagcttgg tccacttgct tgaagacca
301 tgcgggggta agtccttttc fgcccggttg gcttatgaaa cccaatgct gccctttctg
361 ctcttttctc cacaccccc tggggcctc cctccactc cttcccaat ctgtctccc
421 agaagacaca ggaacaatg tattgtctgc ccagcaatca aaggcaatgc tcaaacacc
481 aagtggcccc caccctcagc ccgctcctgc ccgccagca ccccaggcc ctgggggacc
541 tgggtttctc agctgcctca agaagccttg ccatctggcg ctcccagcc tcttgcaaca
601 tctccccttc gttttgagg gggcatgccc gggggagcca ccagccctc actgggttcg
661 gaggagatgc aggaagggcc acgacaaaagc agaaacatcg gatttgggga acgcgtgtca
721 atcccttgtg ccgacgggct gggcgggaga gactgttctg ttcttgtgt aactgtgtg
781 ctgaaagact acctcgttct tgtcttgatg tgtcaccggg gcaactgcct gggggcgggg
841 atgggggagc ggtggaagcg gctccccatt ttatacaaaa ggtgctacat ctatgtgatg
901 ggtgggggag gagggaatc actgggtgcta tagaaattga gatgcccccc caggccagca
961 aatgttcctt tttgttcaaa gtctattttt attccttgat attttcttt ttttttttt
1021 ttttttggg atggggactt gtgaattttt ctaagggtgc tatttaacat gggaggagag
1081 cgtgtgcccg tccagcccag cccgctgctc actttccacc ctctctccac ctgctctgg
1141 ctctcaggc ctctgctctc cgacctctc cctctgaac cctctccac agctgcagcc
1201 catcctccg gctcctcctc agtctgtcct gcctcctctg tccccgggtt tcagagacaa
1261 ctccccaaa cacaaagcag ttttccccc taggggtggg aggaagcaaa agactctgta
1321 cctattttgt atgtgtataa taatttgaga tgttttaat tattttgatt gctggaataa
1381 agcatgtgga aatgacccaa acataa
```

### MicroRNA and Target Gene Description:

|                  |                                |                   |                           |
|------------------|--------------------------------|-------------------|---------------------------|
| miRNA Name       | <a href="#">mmu-miR-29c-3p</a> | miRNA Sequence    | UAGCACCAUUUGAAAUCGGUUA    |
| Previous Name    | mmu-miR-29c                    |                   |                           |
| Target Score     | 95                             | Seed Location     | 877, 919, 1097            |
| NCBI Gene ID     | <a href="#">12842</a>          | GenBank Accession | <a href="#">NM_007742</a> |
| Gene Symbol      | Col1a1                         | 3' UTR Length     | 1439                      |
| Gene Description | collagen, type I, alpha 1      |                   |                           |

### 3' UTR Sequence

```
1 actccctcca ccccaactcg gttccctccc acccagccca cttttccca accctggaaa
61 cagacgaaca acccaactc aatttccccc aaaagcctaaa aatatgggag ataatttcac
121 atggactttg gaaaacattt tttttctttt gcattcactt tcaaacctta gtttttacct
181 ttgaccaact gaactgtgac aaaaaccaaa agtgcattca accttaccaa aaaagaaaaa
241 aaaaaaaga ataaataaat aactttttta aaaaggaagc ttggctctct tgcttgaaga
301 cctatgtggg tataagtccc ttcctgcccc cttggcttat gataccctaa tgctgccttt
361 tctgtctctt tctccacccc ctcttggggc ctctcctcca ttgctccca aatttaagtc
421 tcccccaaga cacaggaaat aatgcattgt ctgccagca aacaaaggca atgctgaaat
481 gtcccaccag cccctcaacc ccgtctactt ccttaccag caccctcaaa tctgctggg
541 acatgggggt ctggaactgt tgaaggaacc taaccatctg gcattctcat ggcctctgca
601 acaaaccccc cactttttc tctcccccc ccccagggga gggcctgtgc tttgggcagc
661 cactgcccc tctcaggggt ttggagccag gcagggtcac agcagactgg aaacatcgga
721 catgcatgtg caggctgggt gggagagacc gttctattcc tcagtgcaat tgtgttctg
781 aaagactacc tctgtctgtt cttgtgtgtg caccggggca actgtgtggg ggcggggatg
841 ggggcagggt ggcagcacgc ccagtttggg atcaagggtg ctacatctct gtgaagggtg
901 ggggtgggaa ggaatttctg gtgctataga agctgagatg ctcccagac cagcaaatgt
961 tctttttgtt caaagtattt tttattcttt tttttttttt ttttaatgga tagggacttg
1021 tgtgaattgt tggggttttt tttttttttt tttttggtt tgttttttt tgttttgtt
1081 tgtttttttt cctgaagggt ctatttaaca agggagaaga gaggcgggg acttcaccct
1141 gcccactctc tactctctct ccactcttct agttcctggg cctatctgat ctctctctt
1201 ctctgaaac cctcccctct tgetgctgct cctcccctc tgcctctctc ttggtctgtc
1261 ctgcatcagg gtttcagagc accactttcc aaagcacaac acagttttta cccctgggct
1321 gggaggaaac aagagactct gtacctattt tgtatgtgta taataattg agatgttttt
1381 aattttttt attgtctgaa taaagcatgt ggaaatgacc caaaaaaaaa aaaaaaaaaa
```

**Supplementary Table 2.** hsa-microRNA-29c-3p and mmu-microRNA-29c-3p have binding sites on collagen type I alpha 1
